# Supplementary material
Source: publisher figshare collection journal article supplement (https://acs.figshare.com/ndownloader/files/23707639)
Supplement: Supplementary file 1 [file 23707639]

**Supplementary Information to the manuscript having the title**

**Multitargeting Antibacterial Activity of a Synthesized Mn<sup>2+</sup> Complex of  
Curcumin on Gram-Positive and Gram-Negative bacterial strains**

**<sup>a</sup>Tanmoy Saha<sup>‡</sup>, <sup>b</sup>Prince Kumar<sup>‡</sup>, <sup>a</sup>Nayim Sepay, <sup>c</sup>Durba Ganguly, <sup>b</sup>Kanchan  
Tiwari, <sup>b</sup>Kasturi Mukhopadhyay\* and <sup>a</sup>Saurabh Das\***

**<sup>a</sup>Department of Chemistry (Inorganic Section), Jadavpur University, Kolkata –  
700032, INDIA.**

**<sup>b</sup>School of Environmental Sciences, Jawaharlal Nehru University, New Delhi –  
110067, INDIA.**

**<sup>c</sup>Department of Inorganic Chemistry, Indian Association for the Cultivation of  
Science, Kolkata – 700032, INDIA.**

**\* Corresponding author. Tel: +91 33 24572148; +91 33 8902087756**

---

**Fax: +91 33 24146223**

**E-mail address: [dasrsv@yahoo.in](mailto:dasrsv@yahoo.in) [kasturim@mail.jnu.ac.in](mailto:kasturim@mail.jnu.ac.in);  
[kasturi26@hotmail.com](mailto:kasturi26@hotmail.com)**

**‡: TS & PK have equal contribution**

**Present address of Prince Kumar: Department of Botany, T. S. College, Hisua, Nawada,  
Magadh University, Bodhgaya – 824 234, India.**

## The supporting information for this manuscript includes

- 1) A figure (S1) showing the absorption spectra of Curcumin and the  $\text{Mn}^{\text{II}}$  complex in DMSO.
- 2) A figure (S2) showing absorption spectra of  $\text{Mn}^{\text{II}}$  interacting with Curcumin in ethanol-water as solvent during determination of stoichiometry of complex formation.
- 3) A figure (S3) showing the infra-red spectrum of Curcumin .
- 4) A figure (S4) showing the infra-red spectrum of  $[\text{Mn}^{\text{II}}(\text{Cur})_2(\text{HCur})]$ .
- 5) A figure (S5) showing TGA of  $[\text{Mn}^{\text{II}}(\text{Cur})_2(\text{HCur})]$ .
- 6) A schematic diagram (S6) showing the keto-enol tautomerism of Curcumin.
- 7) A Table (S1) showing the optimized bond lengths for the carbon-oxygen bonds of Curcumin involved in coordination of  $\text{Mn}^{\text{II}}$ .
- 8) A figure (S7) showing degradation of Curcumin and no degradation of the complex as realized from a change in absorbance in the UV-visible region after being taken in PBS buffer or in PBS buffer with 10  $\mu\text{M}$  DTT.
- 9) A figure (S8) showing degradation of Curcumin and no degradation of the complex realized from a change in absorbance in the UV-visible region after being taken in different bacterial growth medium.
- 10) Double reciprocal plot for interaction of  $[\text{Mn}^{\text{II}}(\text{Cur})_2(\text{HCur})]$  with calf thymus DNA. using UV-Vis spectroscopy (Fig. S9).
- 11) Double reciprocal plot with y intercept = 1 for interaction of  $[\text{Mn}^{\text{II}}(\text{Cur})_2(\text{HCur})]$  with calf thymus DNA using UV-Vis spectroscopy (Fig. S10).
- 12) A figure (S11) showing bacterial survival in logarithmic scale to indicate antibacterial efficacy of  $[\text{Mn}^{\text{II}}(\text{Cur})_2(\text{HCur})]$  and Curcumin on *S. aureus* and *E. coli* cells.
- 13) A figure (S12) showing scanning electron microscope images of *S. aureus* ATCC 29213 treated with either no compound or with Curcumin,  $[\text{Mn}^{\text{II}}(\text{Cur})_2(\text{HCur})]$  and gramicidin D to realize membrane permeabilization of *S. aureus* by the calcein leakage assay.
- 14) Equations related to the dissociation of the three protons on Curcumin.
- 15) A figure (S13) showing the spectrophotometric titration of Curcumin followed at 467 nm.
- 16) Figures showing mole ratio plots (S14A & S14B) and Job's plots of continuous variation (S14C) for Curcumin with  $\text{Mn}^{\text{II}}$  that were followed at 430 nm.

- 17) A figure (S15) showing the spectrophotometric titration of Curcumin in the presence of  $\text{Mn}^{\text{II}}$  followed at 430 nm.
- 18) Equations for the evaluation of stability constant of the complex formed in solution based on the interaction of HCur with  $\text{Mn}^{\text{II}}$  by evaluation of  $\text{pK}_a$  values of HCur in the absence and presence of  $\text{Mn}^{\text{II}}$ .

**Figure S1**

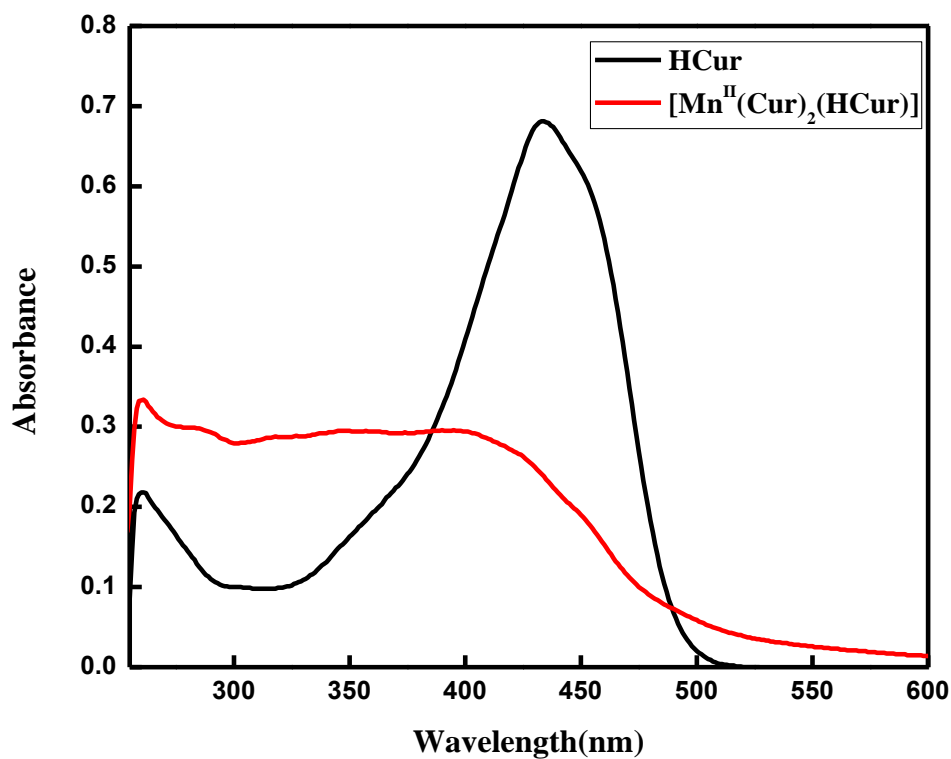

**Figure S1: Absorption spectra for HCur and  $[\text{Mn}^{\text{II}}(\text{Cur})_2(\text{HCur})]$  in DMSO.**

**Figure S2**

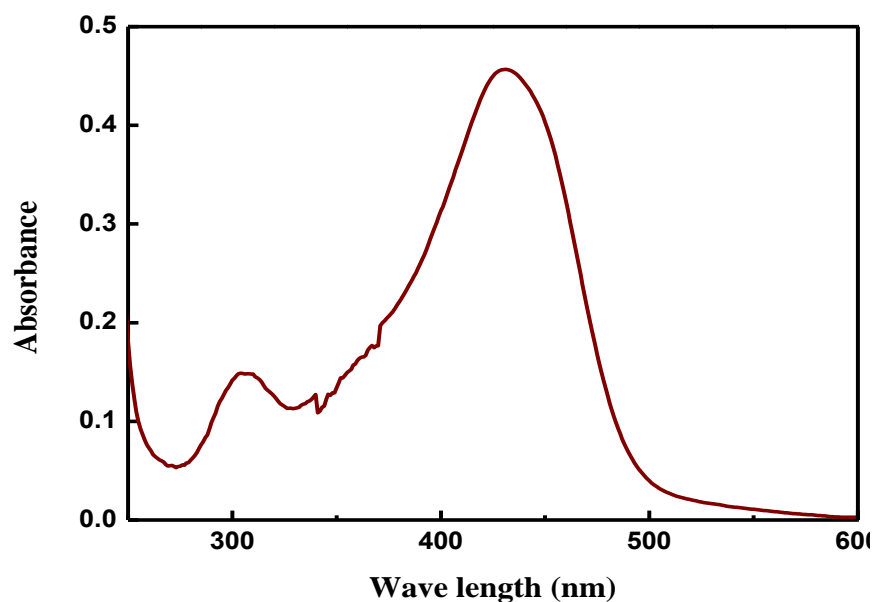

**Figure S2: Absorption spectra for  $\text{Mn}^{\text{II}}$  interacting with Curcumin in ethanol-water during a stoichiometry determination experiment.**

**Figure S3**

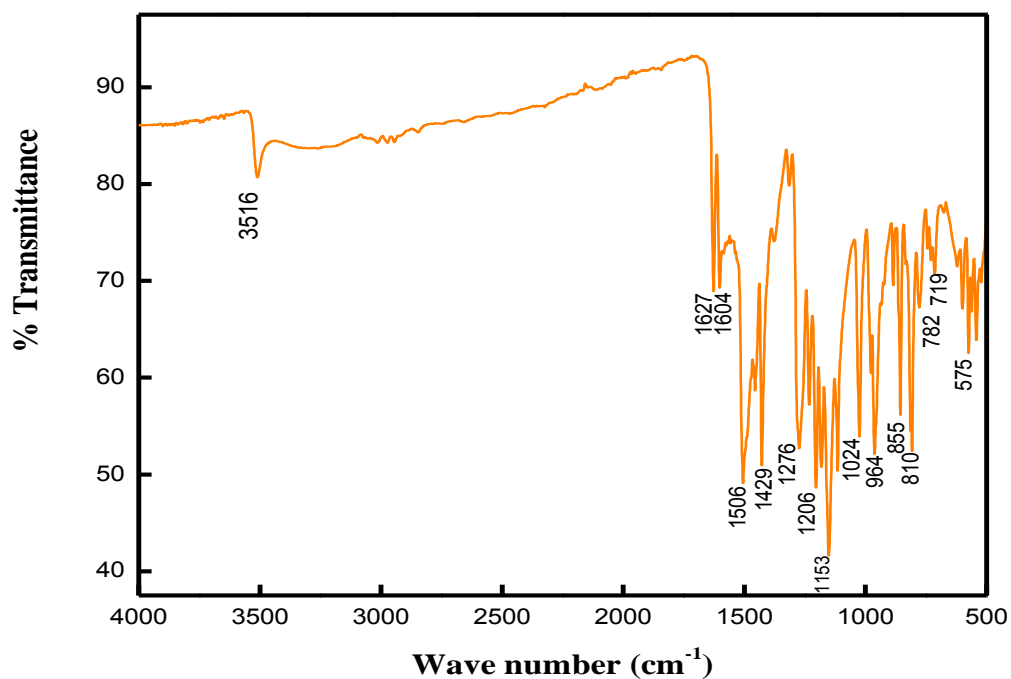

**Figure S3: FTIR spectrum of HCur**

**Figure S4**

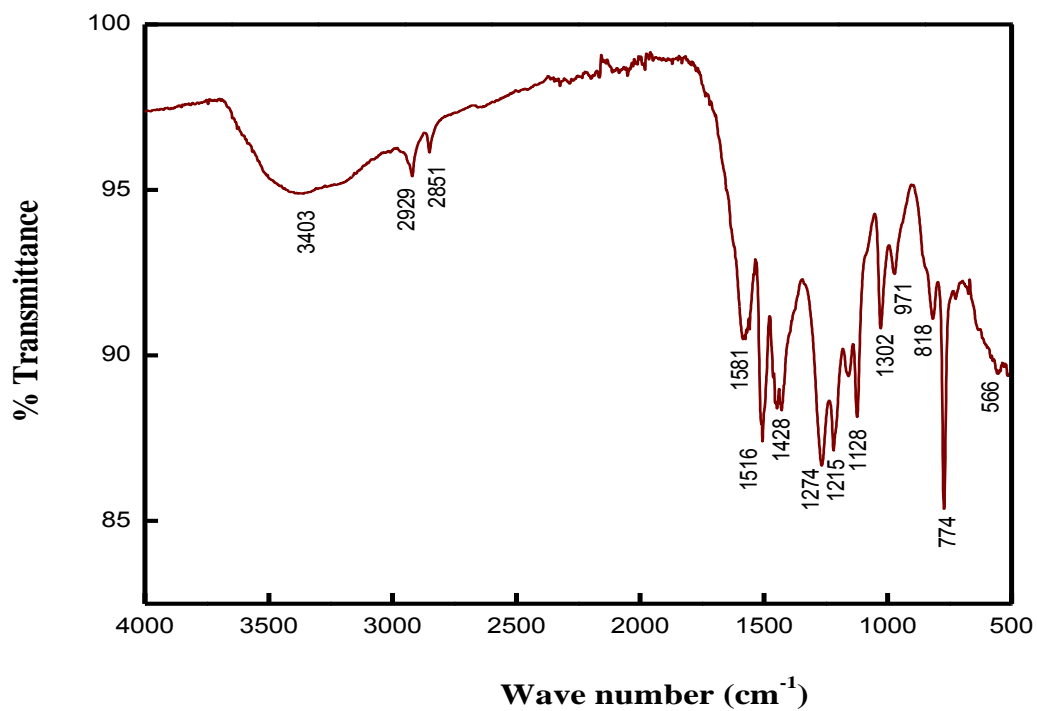

**Figure S4: FTIR spectrum for [Mn<sup>II</sup>(Cur)<sub>2</sub>(HCur)]**

**Figure S5**

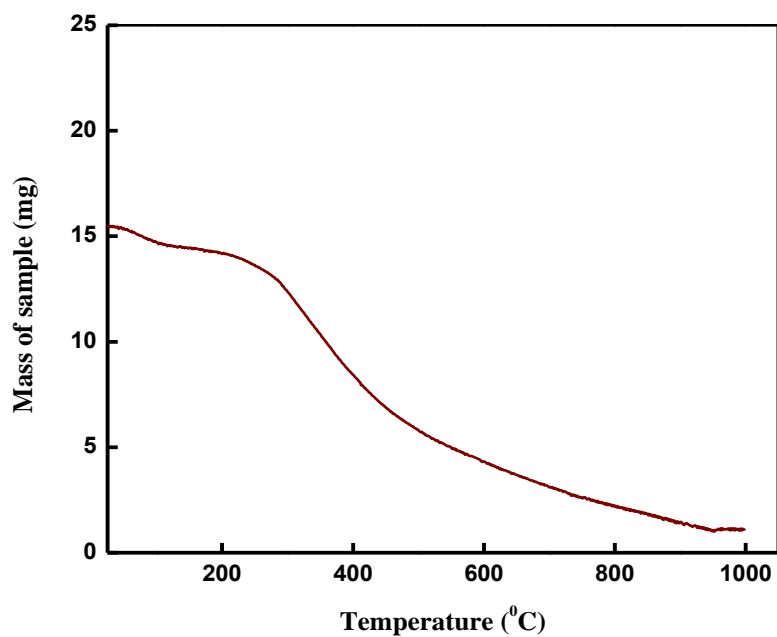

**Figure S5: TGA of [Mn<sup>II</sup>(Cur)<sub>2</sub>(HCur)]**

**Figure S6**

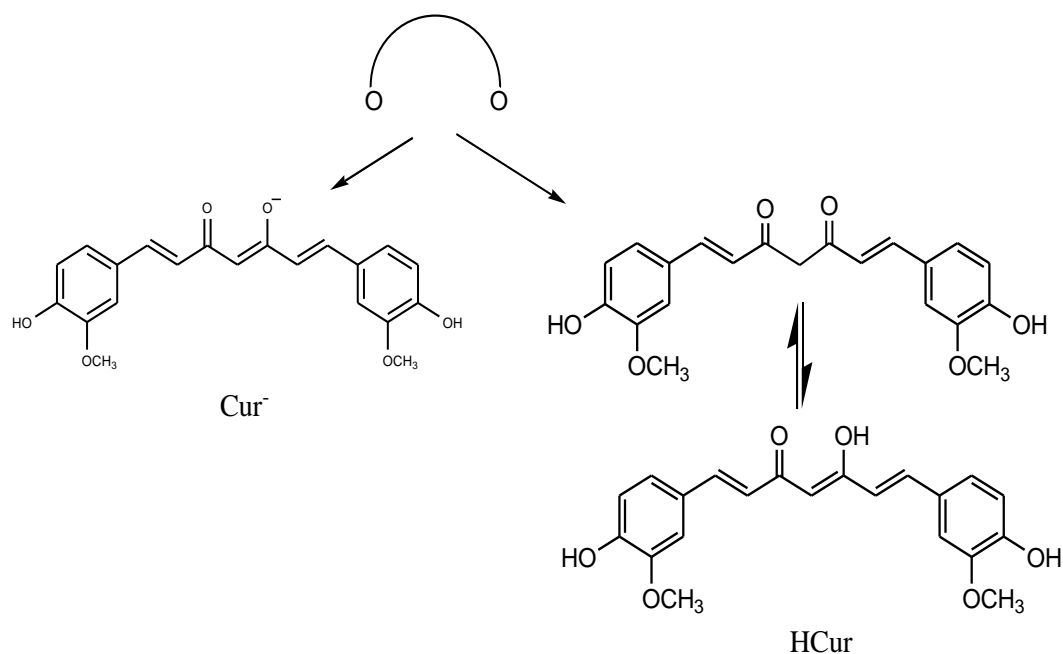

**Figure S6: Structures of Curcumin in the diketo and enolate anion forms.**

**Table S1: Optimized bond lengths for carbon-oxygen bonds of Curcumin involved in coordination of Mn<sup>II</sup>.**

| Bond Type | Bond Length (Å) |
|-----------|-----------------|
| C16-O2    | 1.3051          |
| C17-O4    | 1.3001          |
| C15-O6    | 1.3193          |
| C12-O5    | 1.3099          |
| C11-O3    | 1.3101          |
| C8-O7     | 1.3096          |

**Figure S7**

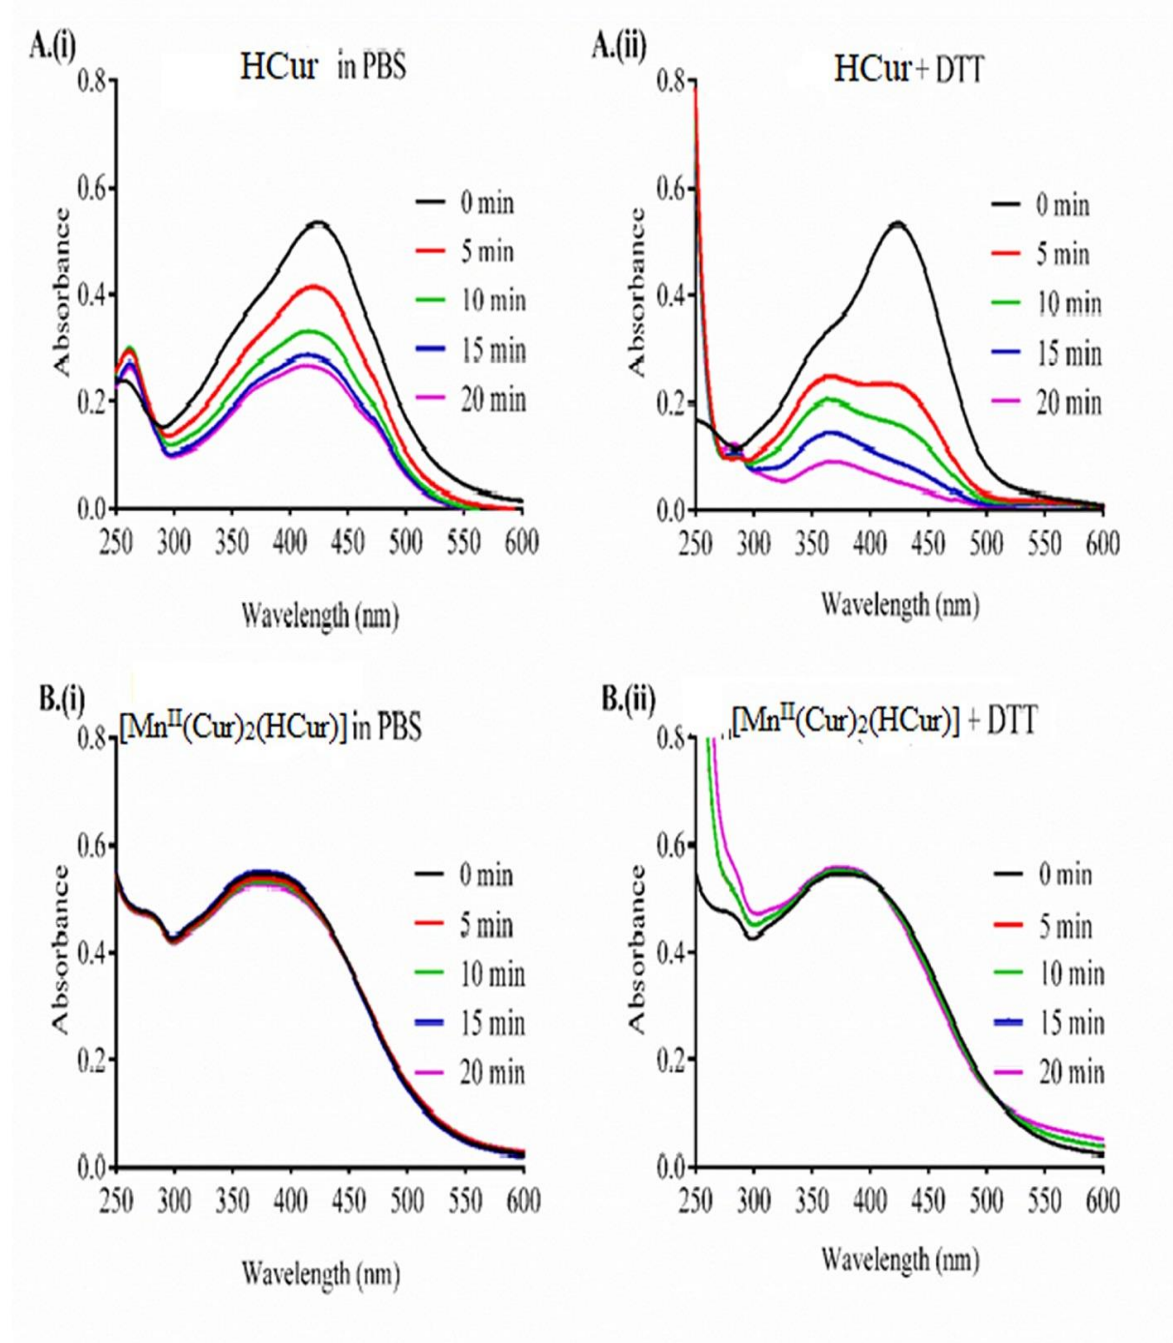

**Figure S7: UV-visible spectra of (A) HCur and (B)  $[\text{Mn}^{\text{II}}(\text{Cur})_2(\text{HCur})]$  in presence of (i) only PBS buffer (pH 7.4) and (ii) PBS buffer with 10  $\mu\text{M}$  DTT.**

**Figure S8**

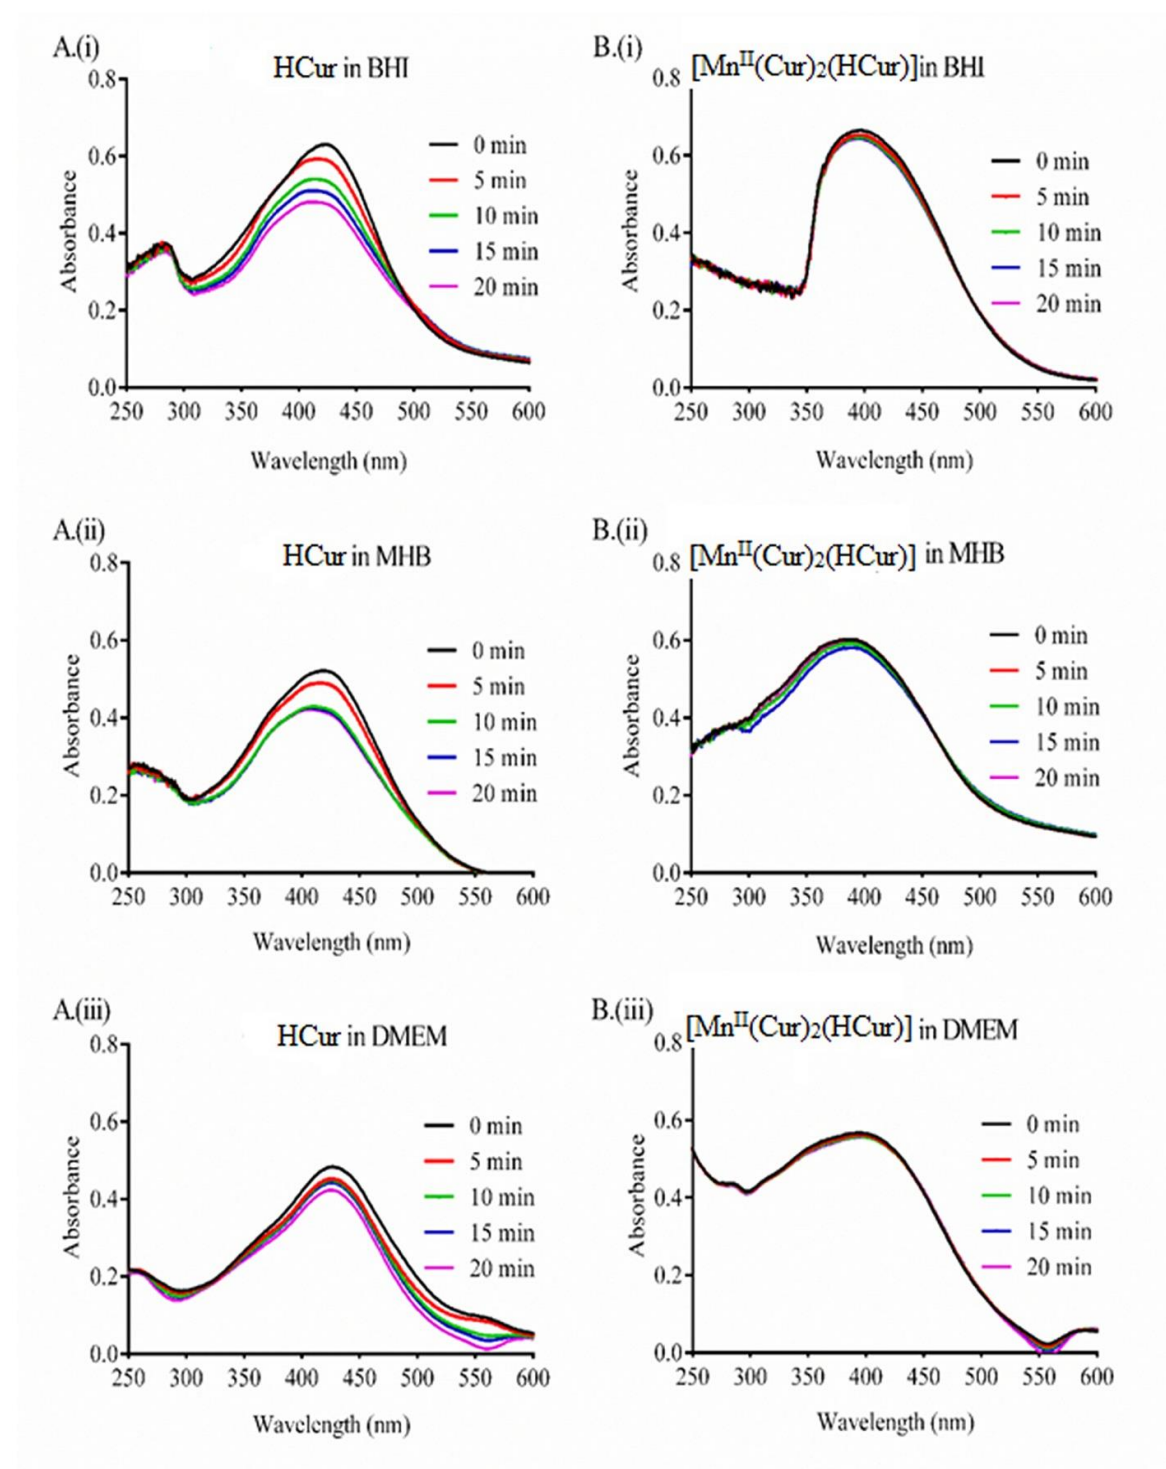

**Figure S8: UV-visible absorption spectra of (A) HCur and (B)  $[\text{Mn}^{\text{II}}(\text{Cur})_2(\text{HCur})]$  in different bacterial growth medium (i) BHI, (ii) MHB, and (iii) DMEM.**



Figure S9

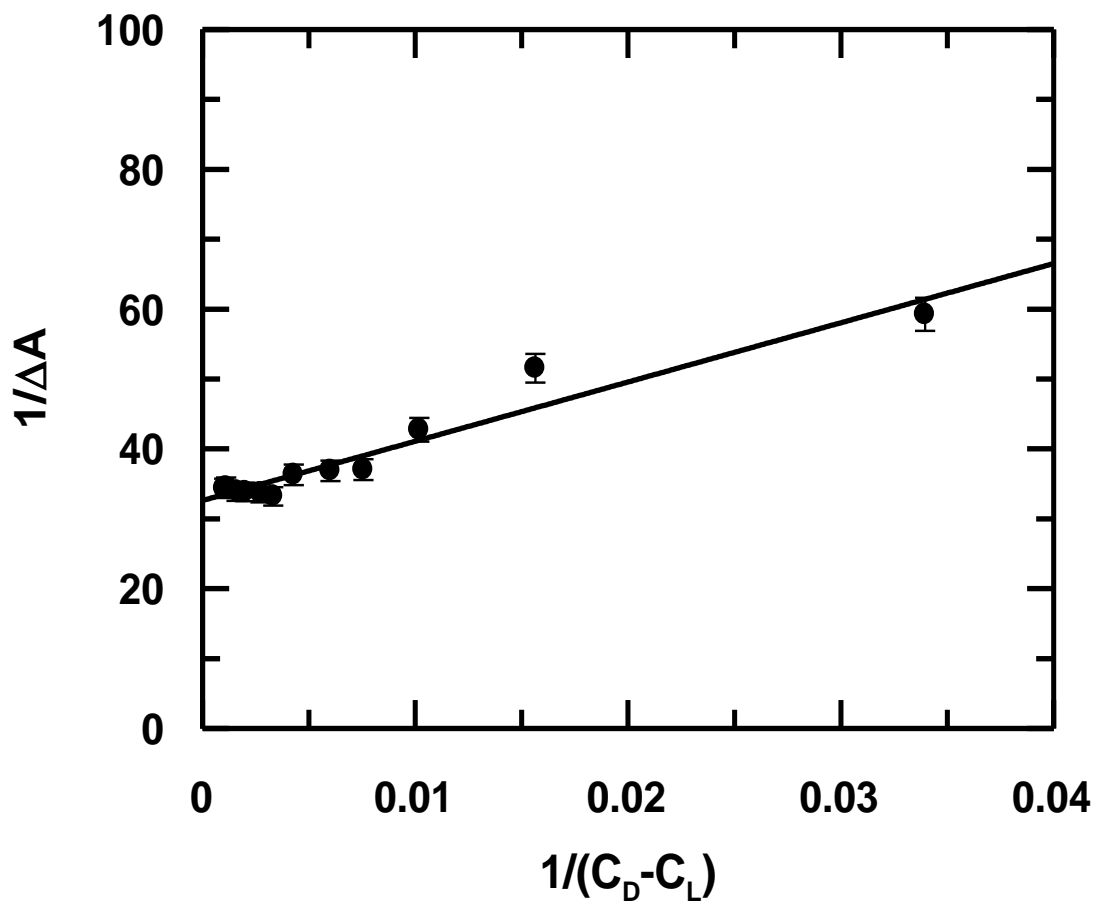

Figure S9: A double reciprocal plot for the interaction of  $[\text{Mn}^{\text{II}}(\text{Cur})_2(\text{HCur})]$  with calf thymus DNA leading to the determination of apparent binding constant ( $K_{\text{app}}$ ) at pH 7.4 (30 mM phosphate buffer) and ionic strength 0.15 M;  $[\text{Mn}^{\text{II}}(\text{Cur})_2(\text{HCur})] = 40 \mu\text{M}$ , pH = 7.4; Temperature = 298 K.

Figure S10

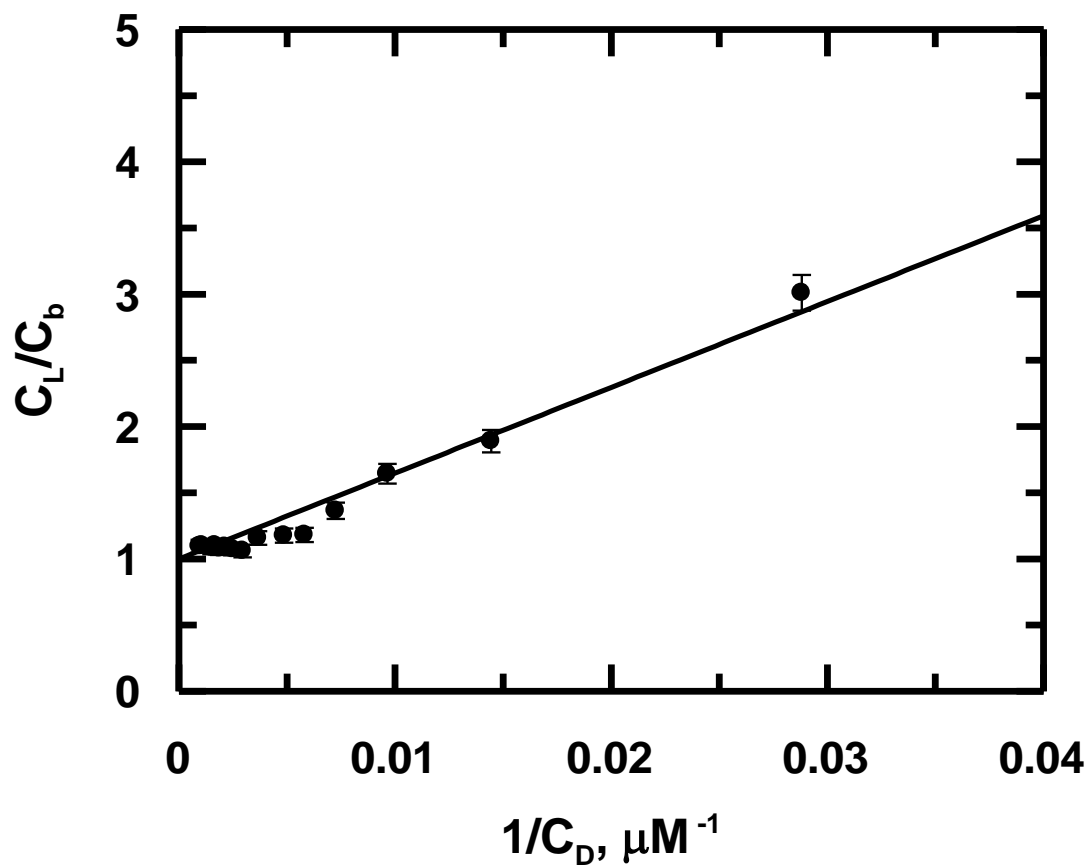

Figure S10: Double reciprocal plot for a UV-Vis titration of 40  $\mu\text{M}$   $[\text{Mn}^{\text{II}}(\text{Cur})_2(\text{HCur})]$  by calf thymus DNA using phosphate buffer ( $\sim\text{pH}$  7.4) at 298 K.

**Figure S11**

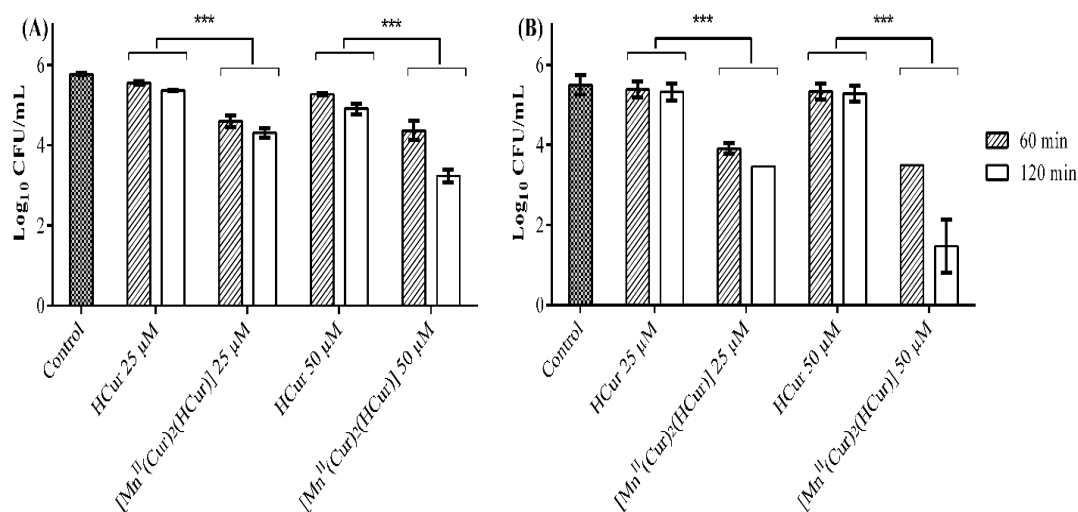

**Figure S11: Antibacterial efficacy of 25 and 50 μM of [Mn<sup>II</sup>(Cur)<sub>2</sub>(HCur)] and HCur in PBS buffer against (A) *S. aureus* and (B) *E. coli* cells (10<sup>6</sup> CFU/mL). Grey columns, columns with stripes, and white columns denote the time of exposure (2 min, 60 min, and 120 min, respectively) to the compounds. The data represent mean (± SD) of three independent experiments (\*\*\*)  $p \leq 0.001$ ).**

**Figure S12**

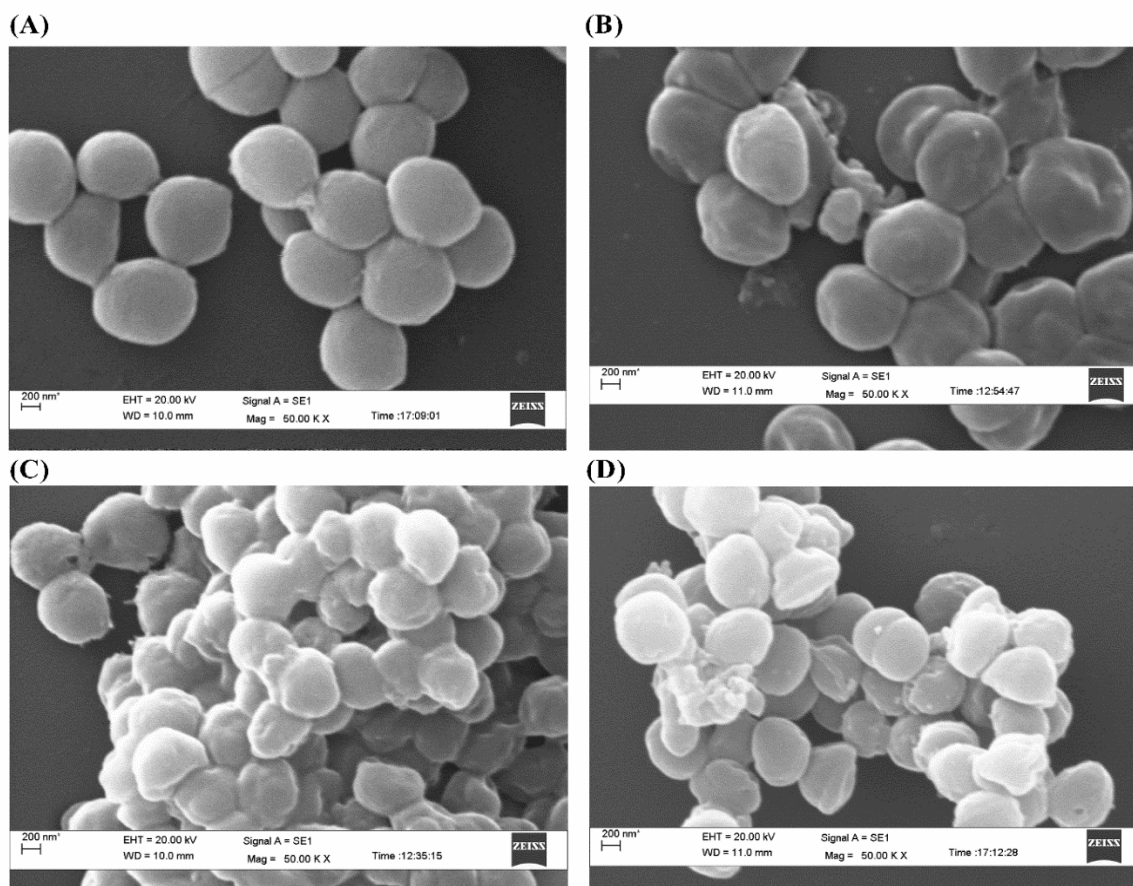

**Figure S12: Scanning electron microscope images of *S. aureus* ATCC 29213 treated with 50  $\mu$ M of HCur,  $[Mn^{II}(Cur)_2(HCur)]$ , and 20  $\mu$ g/mL gramicidin D for 2 hours. (A) Untreated control cells, (B) HCur, (C)  $[Mn^{II}(Cur)_2(HCur)]$  and (D) gramicidin D treated cells.**

Equations with regard to the dissociation of the three protons on HCur.

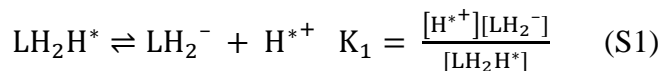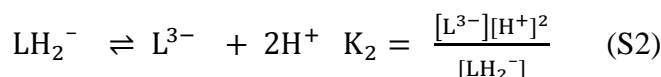

Figure S13

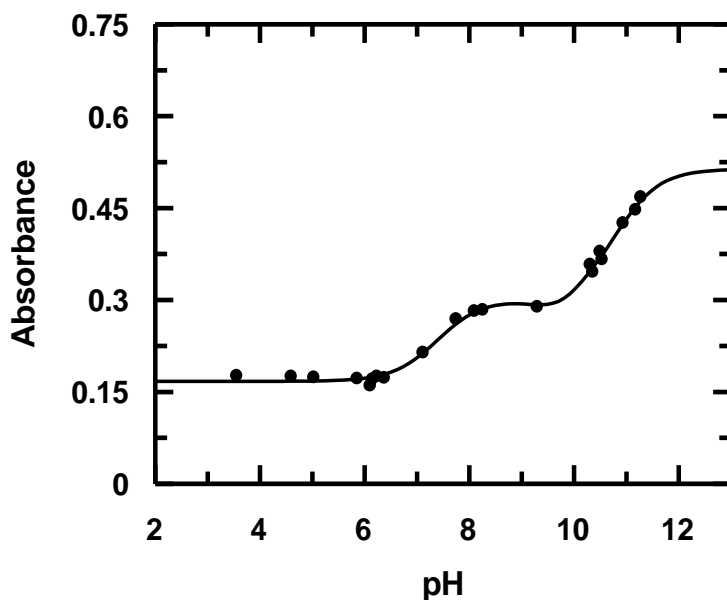

Figure S13: Spectrophotometric titration of HCur as shown by a variation in absorbance at 467 nm; [HCur] = 5  $\mu\text{M}$ , [NaNO<sub>3</sub>] = 0.1 M, Temperature =305K.

The change in absorbance of HCur at 467 nm was fitted to Eq. S3

$$A_{\text{obs}} = \frac{A_1}{(1 + 10^{\text{pH} - \text{pKa}_1} + 10^{\text{pH} - \text{pKa}_2} + 10^{\text{pH} - \text{pKa}_3})} + \frac{A_2}{(1 + 10^{\text{pKa}_1 - \text{pH}} + 10^{\text{pH} - \text{pKa}_2} + 10^{\text{pH} - \text{pKa}_3})} +$$

$$\frac{A_3}{(1 + 10^{\text{pKa}_1 - \text{pH}} + 10^{\text{pKa}_2 - \text{pH}} + 10^{\text{pH} - \text{pKa}_3})} + \frac{A_4}{(1 + 10^{\text{pKa}_1 - \text{pH}} + 10^{\text{pKa}_2 - \text{pH}} + 10^{\text{pKa}_3 - \text{pH}})} \quad (\text{S3})$$

$A_1$ ,  $A_2$ ,  $A_3$  and  $A_4$  refer to absorbance due to  $\text{LH}_2\text{H}^*$ ,  $\text{LH}_2^-$ ,  $\text{LH}^{2-}$  and  $\text{L}^{3-}$  respectively while  $\text{pKa}_1$ ,  $\text{pKa}_2$ ,  $\text{pKa}_3$  are  $\text{pKa}$  values for the dissociation of three protons on Curcumin (Eqs. S1 and S2).

### Experiments to determine stoichiometry of complex formation:

In experiments for mole-ratio and Job's method of continuous variation appropriate amounts of HCur was mixed with Mn(II) in 10 mL volumetric flasks and after shaking the solution for a constant time of 3 minutes, absorbance was recorded. This was then plotted for all the three types of experiments.

If we consider the metal ion to be M and ligand L, then for our case since there is the formation of a 1:3 metal to ligand complex, sequence of reactions would be

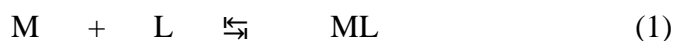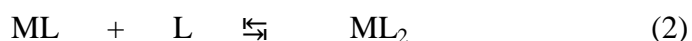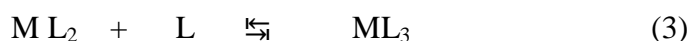

Since each step is an equilibrium step and we are allowing only 3 minutes of shaking time before recording the absorbance using a spectrophotometer it is only likely that for each solution having a certain composition, all species (ML,  $ML_2$  and  $ML_3$ ) would be present simultaneously. If attainment of equilibrium 1 is fast and other two relatively slow, we should see responses for  $ML_2$  and  $ML_3$ . However, if equilibrium 1 is slow we would see responses for ML and  $ML_2$ . Sometimes in such cases, we may not see an exclusive response for  $ML_3$  in the time-frame of our analysis but rather the existence of two species say  $ML_2$  and  $ML_3$ . However, if one refluxes M and L, taking L in excess, for say 4 to 5 hours, which we did in order to prepare the complex one may get  $ML_3$  exclusively.

Something like this happened for Mn(II)-Curcumin where we got responses both from mole-ratio and Job's plots for species in between 1:2 and 1:3 (but tending to 1:3). Had equilibrium for

reaction 3 been fast we would have got a response for  $ML_3$  only but probably that was not the case. In the course of our study, when we refluxed Mn(II) and Curcumin for 4 hours, to prepare the complex we obtained a 1:3 Mn(II)-Curcumin complex that provided a molecular ion peak in mass spectrometry corresponding to the molecular weight of a 1:3 species. Here we are providing all figures related to such experiments leading to determination of stoichiometry.

**Mole ratio plots where concentration of Curcumin was constant, Mn(II) varied:**

- 1: Absorbance recorded immediately i.e. after mixing for 3 minutes
- 2: Absorbance recorded after 6 hours from mixing.
- 3: Absorbance recorded after 24 hours from mixing.

**Figure S14A**

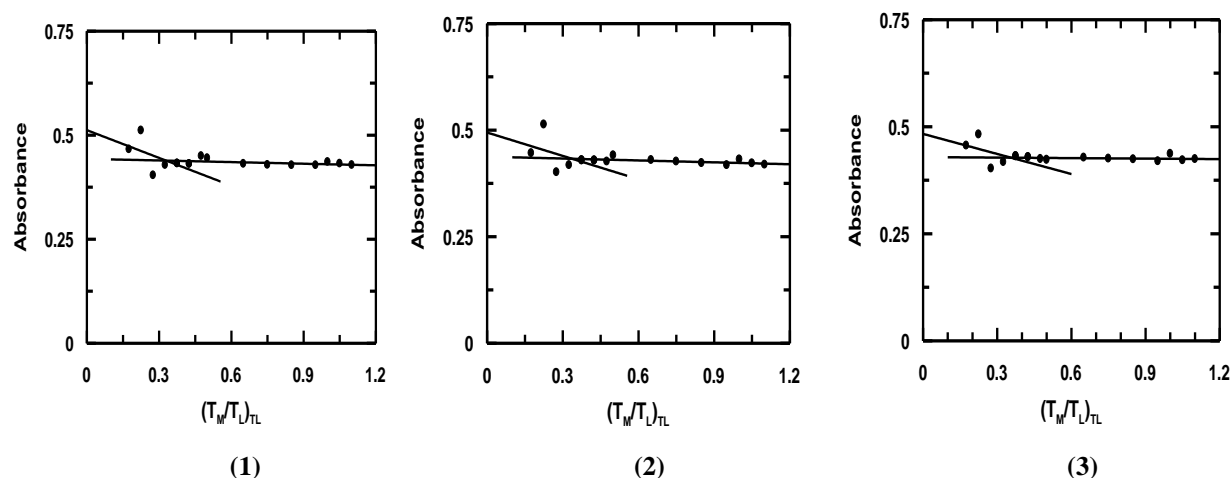

**Figure S14A: Mole-ratio plots showing variation in absorbance at 430 nm for a change in concentration of  $Mn^{II}$  for a fixed concentration of HCur = 10  $\mu$ M; (1) immediately after HCur and Mn(II) were mixed; (2) after 6 hours from the time HCur and Mn(II) were mixed; (3) after 24 hours from the time HCur and Mn(II) were mixed; pH of the medium:  $\sim 7.4$ ,  $[NaNO_3] = 0.01$  M, Temperature = 303 K.**

**Mole ratio plots where concentration of Mn(II) constant, Curcumin was varied:**

**1:** Absorbance recorded immediately i.e. after mixing for 3 minutes

**2:** Absorbance recorded after 24 hours.

**Figure S14B**

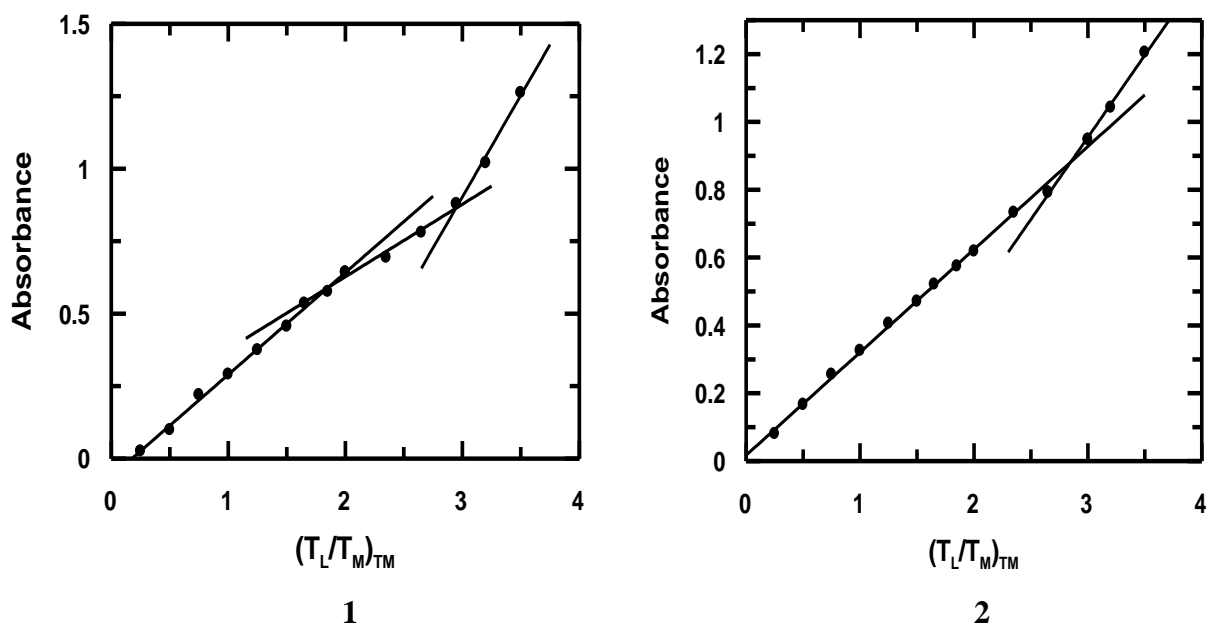

**Figure S14B: Mole-ratio plots showing variation in absorbance at 430 nm for a change in concentration of HCur for a fixed concentration of  $Mn^{II} = 10 \mu M$ ; (1) immediately after HCur and Mn(II) were mixed; (2) after 24 hours from the time HCur and Mn(II) were mixed; pH of the medium:  $\sim 7.4$ ,  $[NaNO_3] = 0.01 M$ , Temperature = 303 K.**



Job's plots from three separate experiments where both Mn(II) and Curcumin were varied continuously

Figure S14C

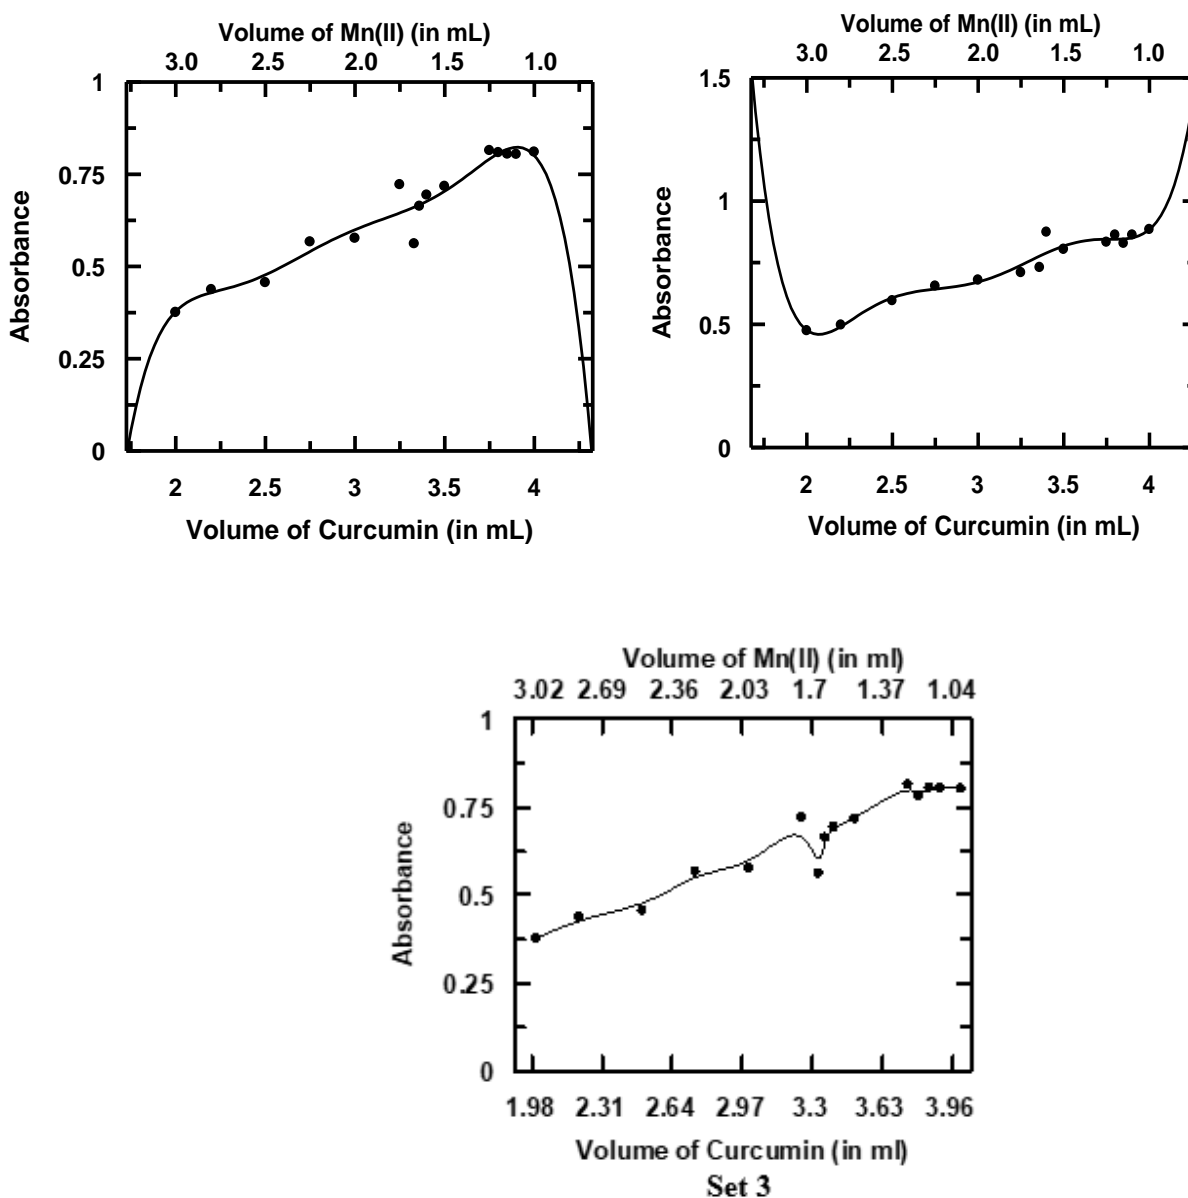

Figure. S14C: Plot showing a variation in absorbance at 430 nm for a continuous variation of HCur and Mn<sup>II</sup> for three different experimental sets, Set 1, Set 2 and Set3 at pH (~7.4). Strength of stock solutions of Mn<sup>II</sup> and HCur were 100  $\mu$ M; [NaNO<sub>3</sub>] = 0.01 M, Temperature = 303 K.

Figure S15

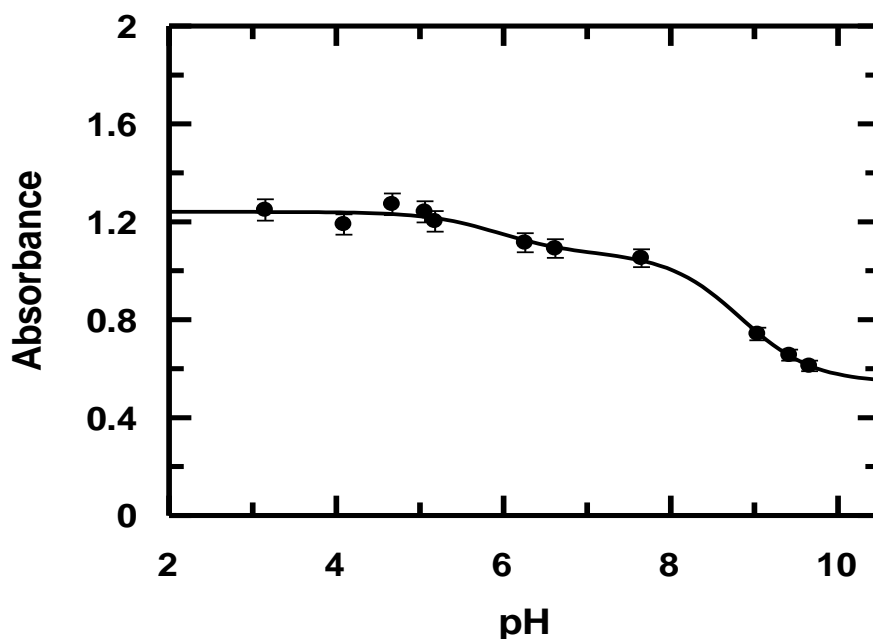

**Figure S15: Titration of HCur performed in the presence of  $\text{Mn}^{\text{II}}$ , as shown by a variation in absorbance at 430 nm;  $[\text{HCur}] = 30 \mu\text{M}$ ,  $[\text{Mn}^{\text{II}}] = 10 \mu\text{M}$ ,  $[\text{NaNO}_3] = 0.01 \text{ M}$ , Temperature = 305 K.**

$$A_{\text{obs}} = \frac{A_1}{(1 + 10^{\text{pH} - \text{pKa1}} + 10^{\text{pH} - \text{pKa2}})} + \frac{A_2}{(1 + 10^{\text{pKa1} - \text{pH}} + 10^{\text{pH} - \text{pKa2}})} + \frac{A_3}{(1 + 10^{\text{pKa1} - \text{pH}} + 10^{\text{pKa2} - \text{pH}})} \quad (\text{S4})$$

$A_1$ ,  $A_2$  and  $A_3$  are absorbances due to  $\text{LH}_2\text{H}^*$ ,  $\text{LH}_2^-$  and  $\text{L}^{2-}$  respectively in the presence of  $\text{Mn}^{\text{II}}$ .

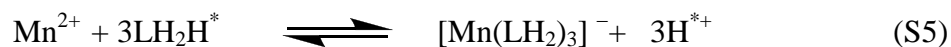

$$\beta^* = \frac{[\text{Mn}(\text{LH}_2)_3][\text{H}^{*+}]^3}{[\text{Mn}^{2+}][\text{LH}_2\text{H}^*]^3} \quad (\text{S6})$$

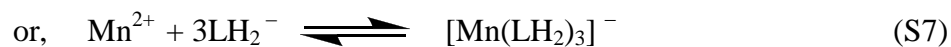

$$\beta = \frac{[\text{Mn}(\text{LH}_2)_3]}{[\text{Mn}^{2+}][\text{LH}_2^-]^3} \quad (\text{S8})$$

$$\beta = \frac{\beta^*}{K_1^3} \quad (\text{S9})$$

$\text{LH}_2\text{H}^*$  represents HCur;  $K_1$  is the dissociation constant of the enolic-OH proton of HCur.
